# Supplementary material for: Hematopoietic upstream stimulating factor 1 deficiency is associated with increased atherosclerosis susceptibility in LDL receptor knockout mice
Source: PubMed Central journal article supplement (PMC8361089; doi:10.1038/s41598-021-95858-y), 2021-08-12
Supplement: 41598_2021_95858_MOESM1_ESM.pdf [file 41598_2021_95858_MOESM1_ESM.pdf]

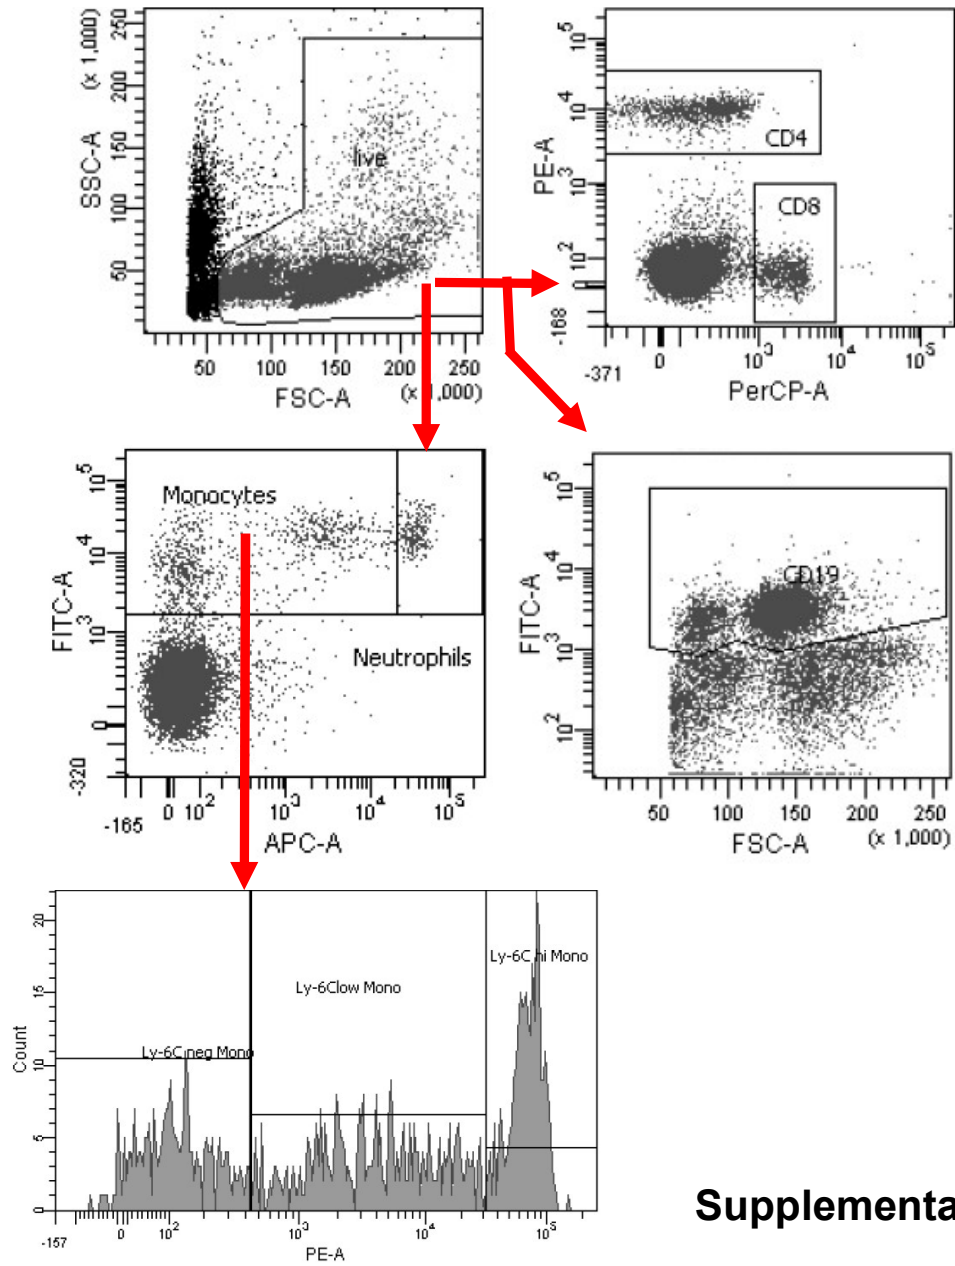

**Supplemental Figure 1: Gating strategy used for flow cytometric analysis**
